# Supplementary material for: Ancient genomic linkage of α-globin and Nprl3 couples metabolism with erythropoiesis
Source: Springer Nature journal article supplement (doi:10.1038/s41467-025-57683-z), 2025-03-24
Supplement: MOESM1 [file 41467_2025_57683_MOESM1_ESM.pdf]

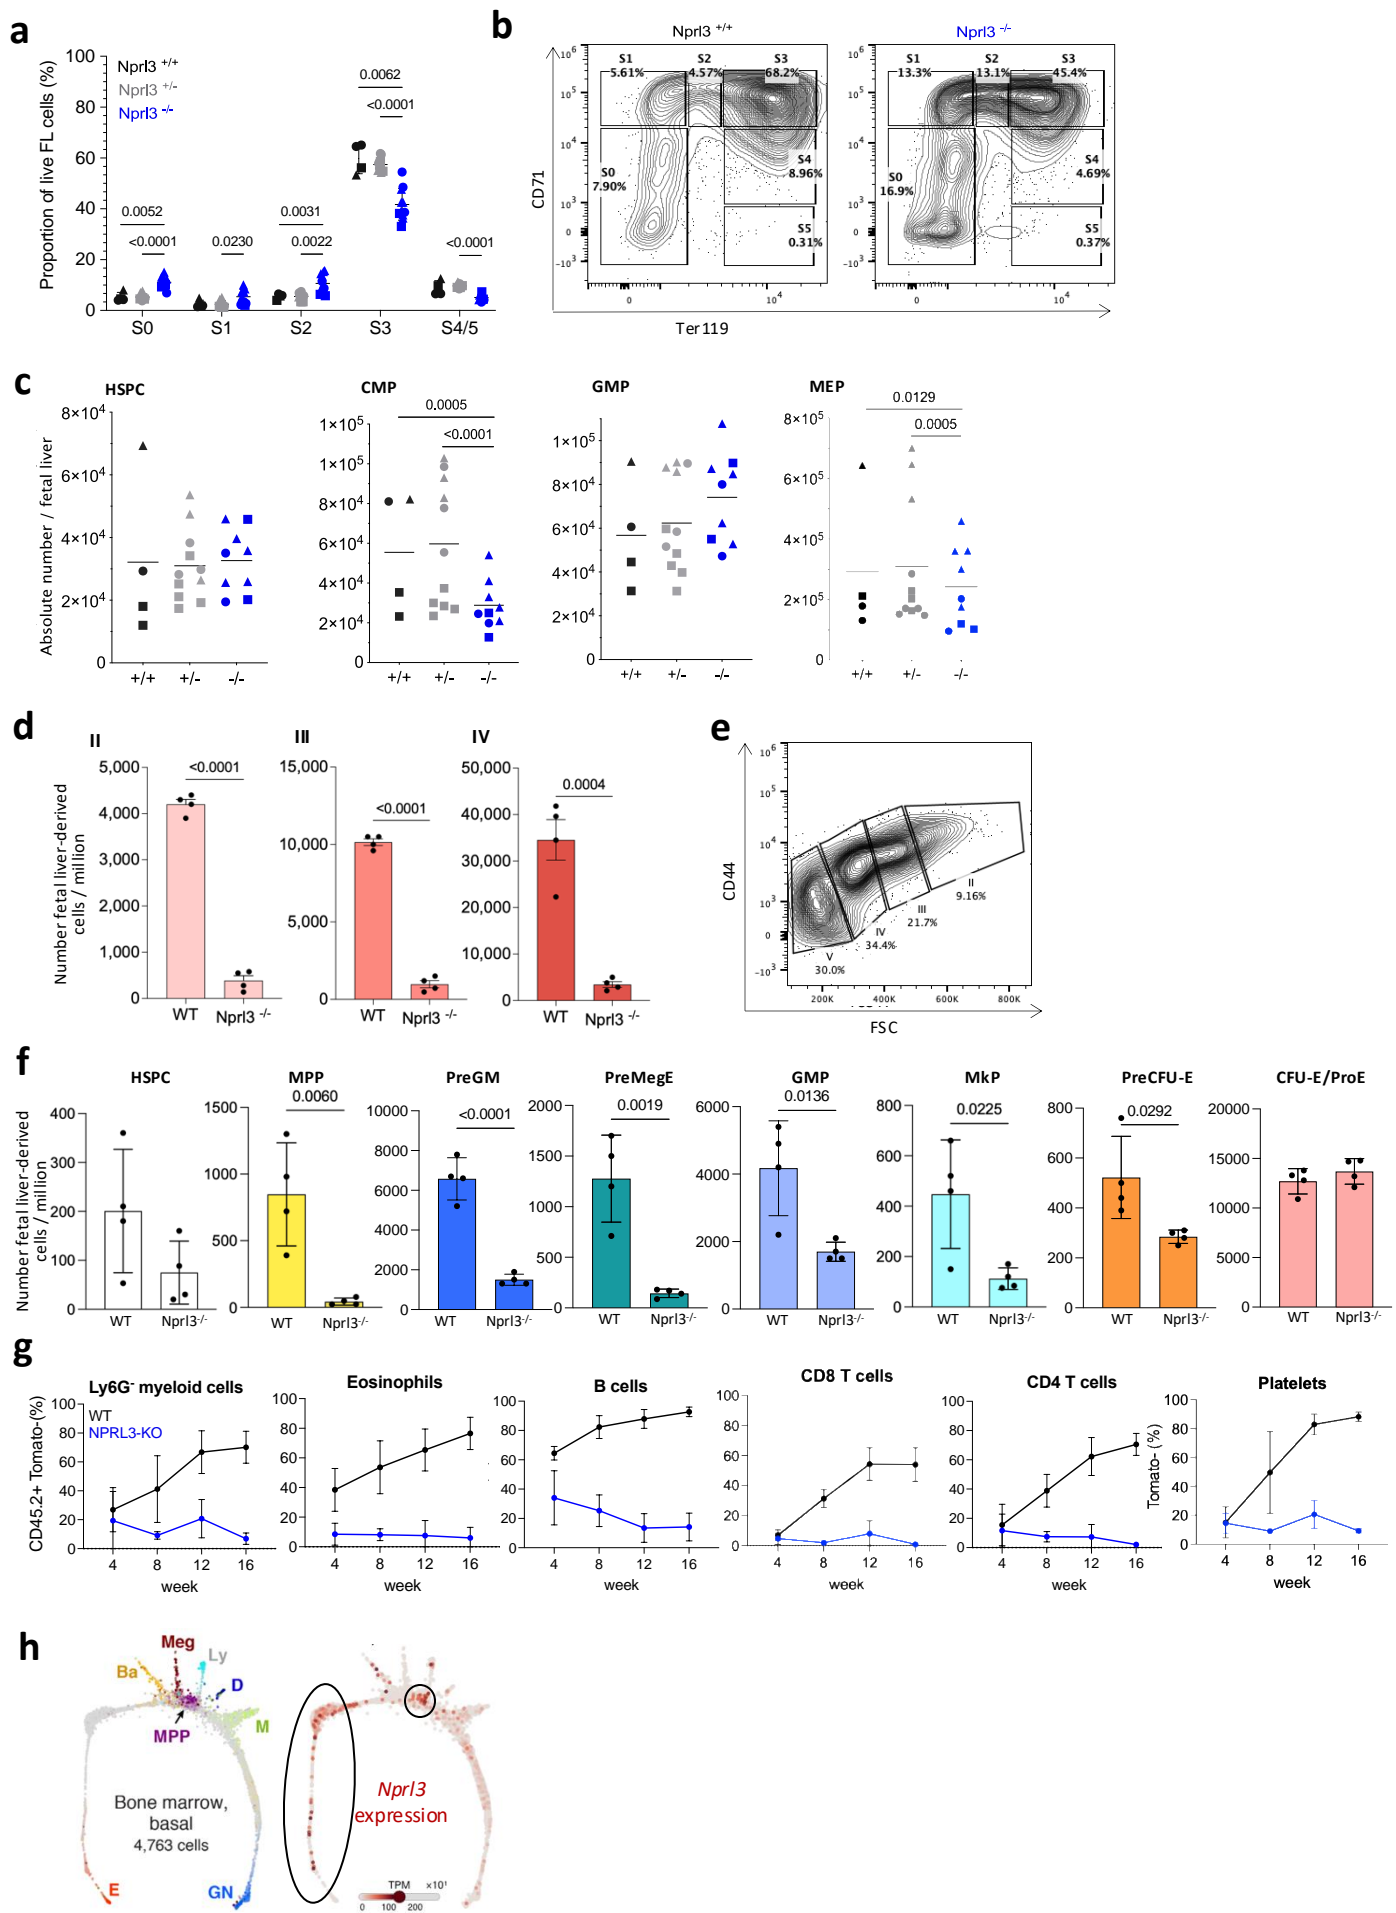

**Supplementary Fig. 1. Effects of *Nprl3*<sup>-/-</sup> in the fetal liver and in competitive chimaeric mice.** a) Erythroid stages as a proportion of total live fetal liver cells according to genotype (n = 3 litters). Points indicate individual embryos. Data are expressed as the mean ± SD. Analysed by Two-way ANOVA followed by Tukey's test. b) Example gating of erythroid stages in the fetal liver at E13.5. c) Absolute number per fetal liver of: total c-kit+ cells of lineage- Sca-1+ HSPCs, CD34+ CD16/32+ GMPs, CD34+ CD16/32- CMPs and CD34- CD16/32- MEPs (n = 5 litters). Each point represents an individual embryo, and litter indicated by shape of point. Data are expressed as the mean ± SD, and analysed by Two-way ANOVA (grouped by litter) followed by Tukey's test. d) Absolute number of erythroblasts in stages II, II and IV derived from either WT or *Nprl3*<sup>-/-</sup> fetal liver cells, per million recipient bone marrow cells. Analysed in recipient bone marrow at week 16 post-transplantation (n = 8 mice per group). Data analysed by two-tailed t-test, and expressed as the mean ± SD. e) Example gating of erythroid stages in the bone marrow. f) Absolute number of fetal liver-derived (CD45.2+ Tomato-) progenitors per million recipient bone marrow cells at week 16 post transplantation (n = 4 mice per group). Data analysed by two-tailed t-test, and expressed as the mean ± SD. g) Temporal contribution of *Nprl3*<sup>-/-</sup> FL cells to peripheral mature cell types: Ly6G- myeloid cells, eosinophils, B cells, CD4/8 T cells and platelets. h) Single cell RNA-Seq measured from mouse bone marrow-derived cells. The spatial positions of HSCs and erythroid precursors are indicated. Adapted from an online tool published in Tusi et al. 2018. [https://kleintools.hms.harvard.edu/paper\\_websites/tusi\\_et\\_al/](https://kleintools.hms.harvard.edu/paper_websites/tusi_et_al/). Source data are provided as a Source Data file.

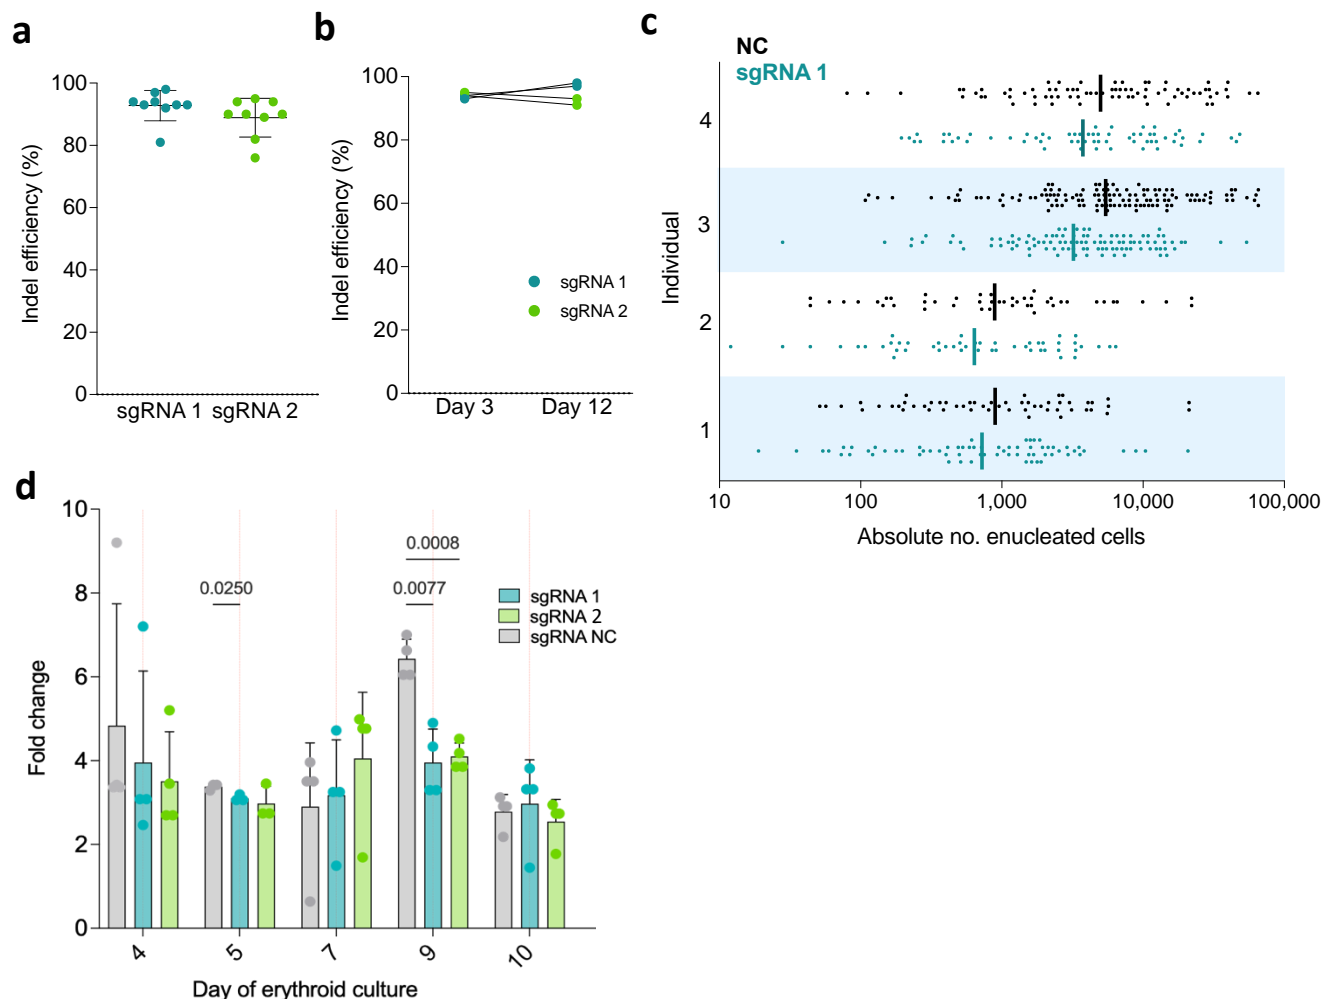

**Supplementary Fig. 2. Effects of NPRL3-KO on primary human *in vitro* erythroid differentiation.**

a) Editing efficiency (% reads with identical knockout indel) achieved with NPRL3-targeting sgRNAs, sgRNA 1 and sgRNA 2. Each point represents a nucleofected donor population. b) Maintenance of editing efficiency from day 3 to day 12 of erythroid culture. c) Absolute number of enucleated cells formed from a single starting cell (each point represents a single starting cell). Bars indicate the geometric mean. Four individual donors are represented, stacked. d) Fold change in cell concentration throughout erythroid differentiation compared to previous dilution. Cells were counted on days 3, 4, 5, 7, 9 and 10, and concentration was normalised after every count from day 4 by media top up (except for day 7, which represents replacement with phase 2 media). Plotted points indicate the fold change in cell concentration relative to the normalised concentration established after the previous count point. Data represents 3 individual donors, expressed as the mean  $\pm$  SD, and analysed by Prism Mixed-effects analysis matched by donor individual, followed by Tukey's test. Source data are provided as a Source Data file.

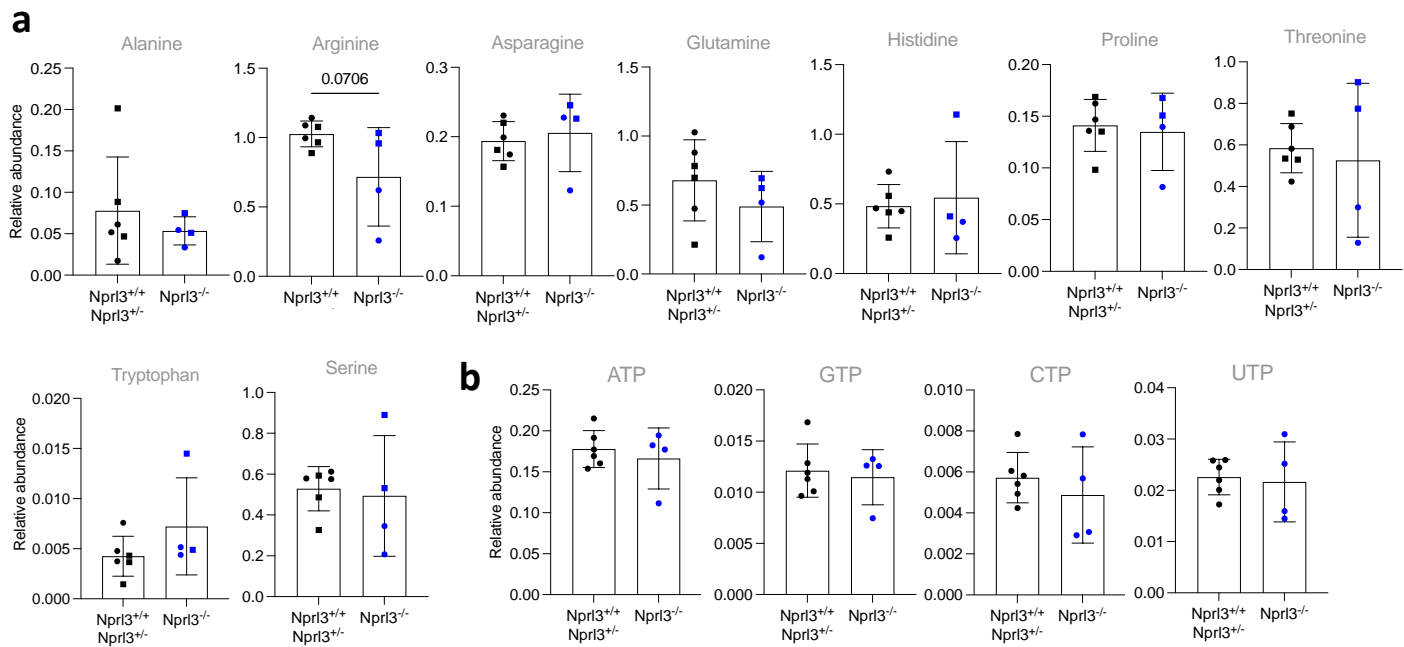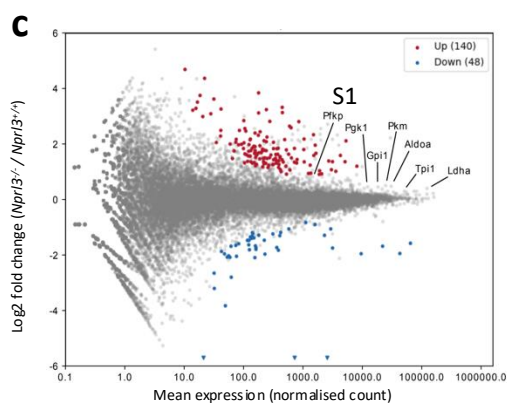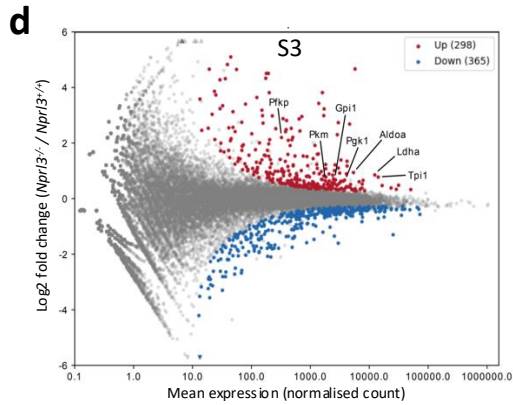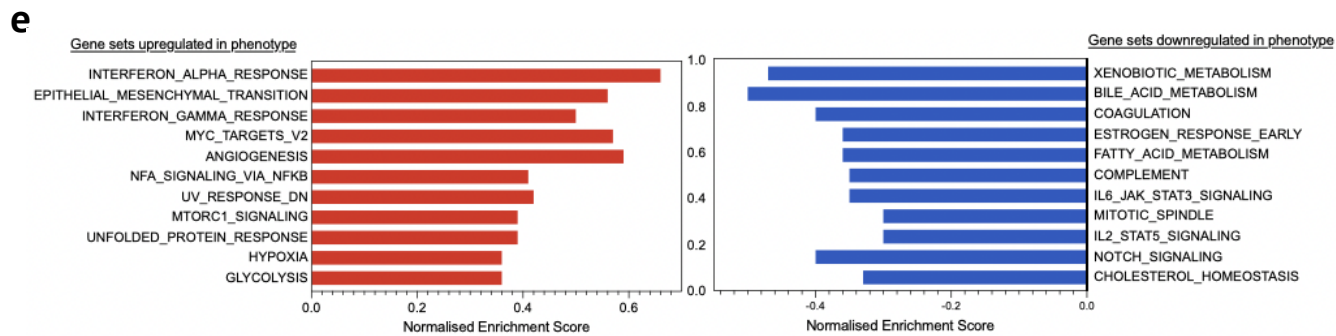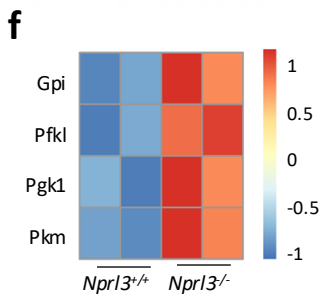

**Supplementary Fig. 3. Further multi-omic data assessing dysregulations in *Nprl3*<sup>-/-</sup> erythroblasts.**

a) Relative abundance of amino acids, measured by LC-MS, normalised to D7-glucose (internal control). b) Relative abundance of nucleotides, measured by LC-MS normalised to myristic acid (internal control). All LC-MS data were compared by two-tailed t-test. Differential expression analysis in S1 and S3. Each point gives the mean expression of a single gene and the log2 fold change in *Nprl3*<sup>-/-</sup> samples compared to *Nprl3*<sup>+/+</sup> samples. Genes that were not significantly differentially expressed are plotted in grey, significantly upregulated genes in red and significantly downregulated genes in blue. c and d) Differential expression analysis in c) S1 and d) S3. Each point gives the mean expression of a single gene and the log2 fold change in *Nprl3*<sup>-/-</sup> samples compared to *Nprl3*<sup>+/+</sup> samples. Genes that were not significantly differentially expressed are plotted in grey, significantly upregulated genes in red and significantly downregulated genes in blue. e) Top up and downregulated “hallmark” gene sets identified by RNA-Seq GSEA. f) Proteins in the KEGG\_glycolysis\_gluconeogenesis gene set identified as significantly upregulated in *Nprl3*<sup>-/-</sup> samples compared to *Nprl3*<sup>+/+</sup> by proteomics, with Gpi manually added. Source data are provided as a Source Data file.

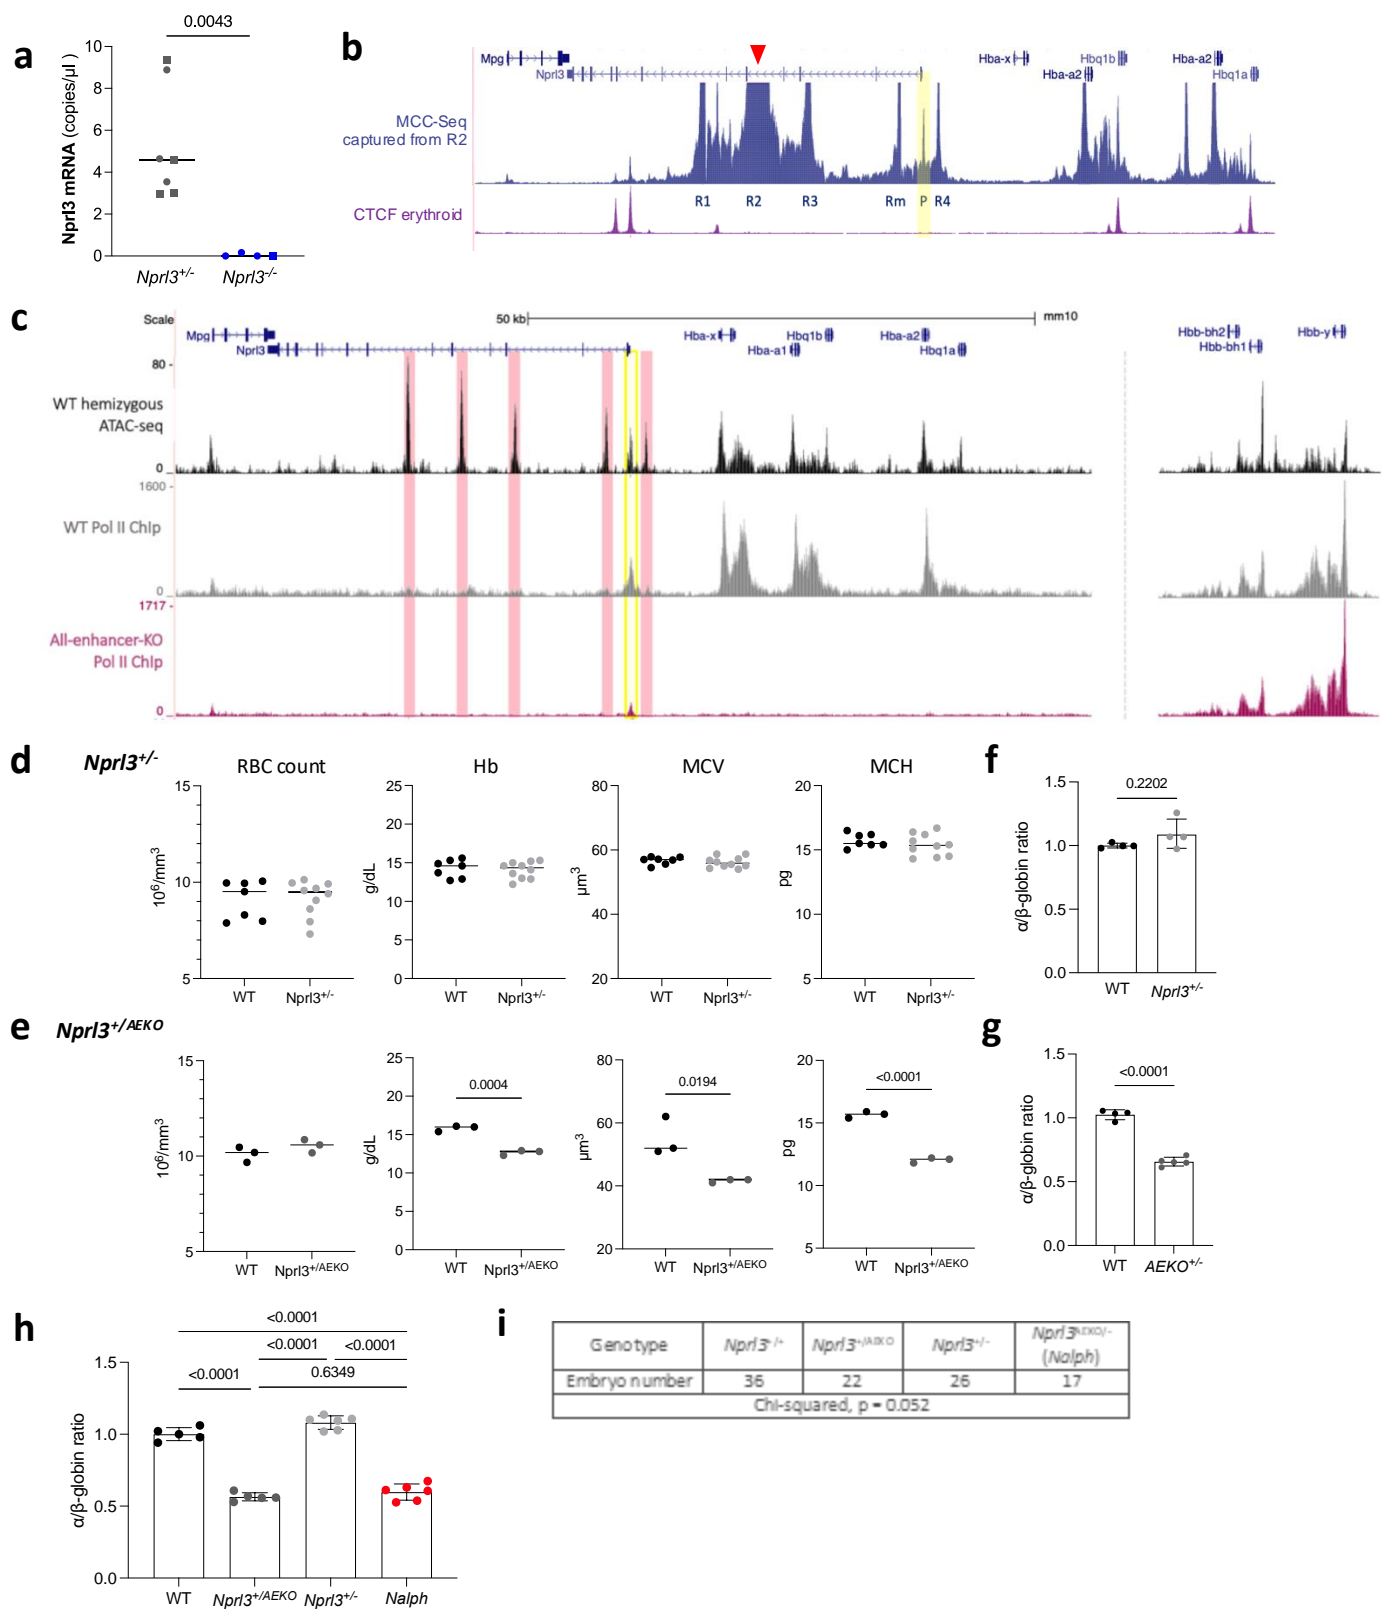

**Supplementary Fig. 4. Further characterisation of the Nprl3- $\alpha$ -globin transcriptional hub.**

a) Promoter-specific *Nprl3* mRNA expression in *Nprl3*<sup>-/-</sup> S3 erythroblasts (a negative control for Fig. 4c) compared to *Nprl3*<sup>+/-</sup> littermates (n = 2 litters, no WT embryos were present). Analysed by unpaired t-test. Each point represents an embryo, with litter represented by shape. b) MCC-Seq snapshot captured from the R2 enhancer (anchor point indicated by red arrowhead). Yellow panel highlights the interaction of the R2 enhancer with the *Nprl3* promoter (P). c) Pol II ChIP-Seq in WT erythroid cells, and following deletion of all  $\alpha$ -globin enhancers from cells hemizygous for the locus including *nprl3* and alpha (all-enhancer-KO). Enhancers indicated by pink panels, and the *Nprl3* promoter by yellow. d, e) Peripheral blood measurements (RBC count, Haemoglobin (Hb), mean corpuscular volume (MCV) and mean corpuscular haemoglobin (MCH)) of d) *Nprl3*<sup>+/-</sup>, and e) *Nprl3*<sup>+/-</sup>/*AEKO* adults and their littermate WT controls. Analysed by two-tailed t-test. Data expressed as the mean  $\pm$  SD. f, g, h)  $\alpha/\beta$ -globin mRNA expression ratio measured by RT-qPCR on f) littermate WT and *Nprl3*<sup>+/-</sup>, g) littermate WT and *AEKO*<sup>+/-</sup> Ter119+ cells, and h) littermates from the *Nprl3*<sup>+/-</sup> x *Nprl3*<sup>+/-</sup>/*AEKO* cross. Analysed by unpaired t-test (f and g) or One-way ANOVA (h). i) Number of embryos of each genotype across 12 litters of *Nprl3*<sup>+/-</sup> x *Nprl3*<sup>+/-</sup>/*AEKO* animal crosses. Source data are provided as a Source Data file.

**a**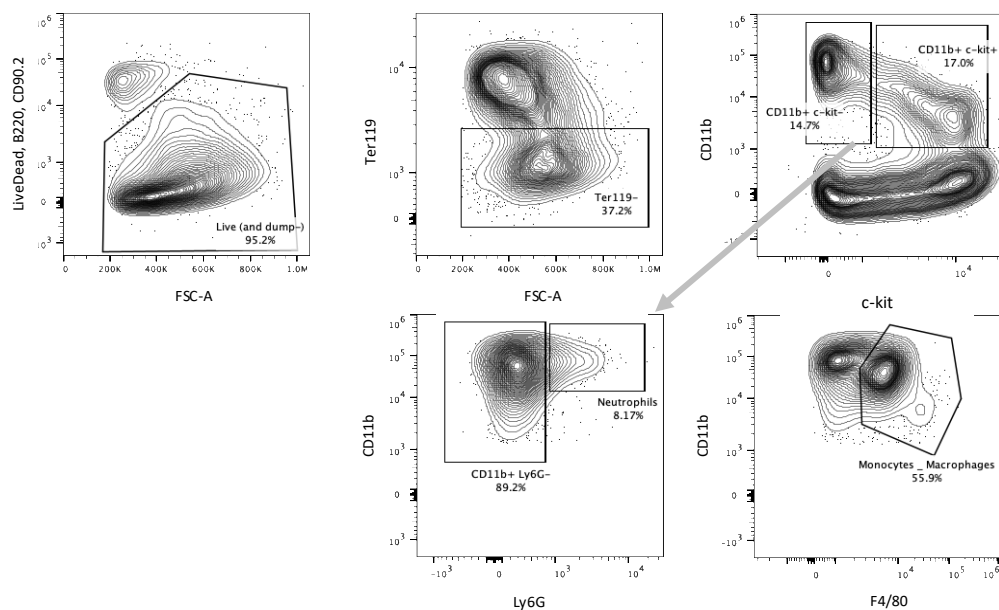**b**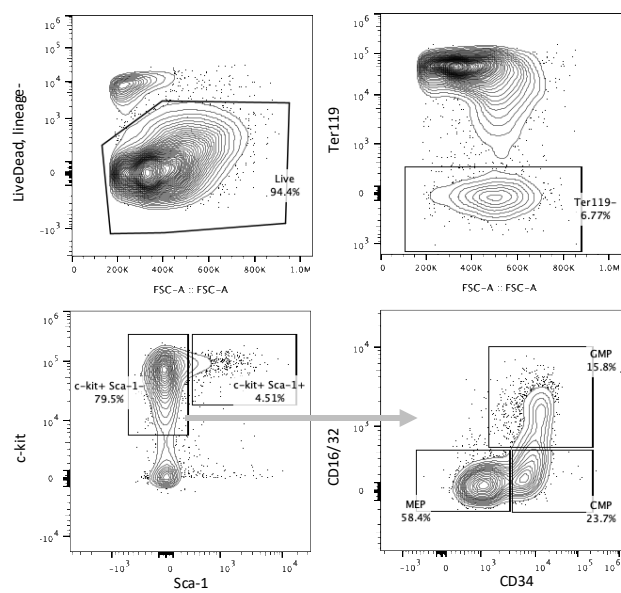**c**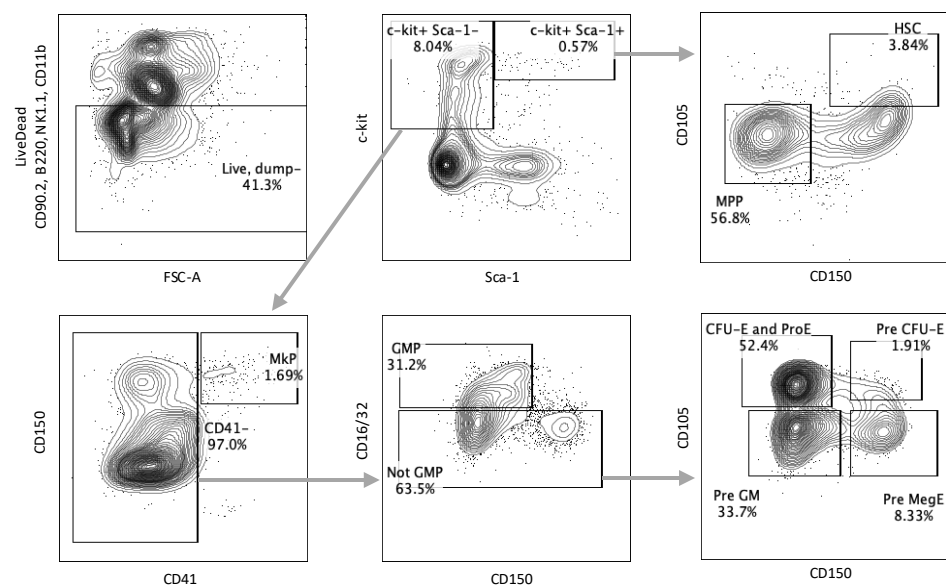

**Supplementary Fig. 5. Representative flow cytometry gating schemes.**

- a) Myeloid cell types (as per Fig. 1f).
- b) Haematopoietic progenitors in the fetal liver (as per Supplementary Fig. 1c).
- c) Haematopoietic progenitors in the bone marrow (as per Supplementary Fig. 1f)
